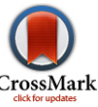

# Engagement with Health Agencies on Twitter

Sanmitra Bhattacharya<sup>1\*</sup>‡, Padmini Srinivasan<sup>1</sup>, Phil Polgreen<sup>2</sup>

<sup>1</sup> Department of Computer Science, The University of Iowa, Iowa City, Iowa, United States of America, <sup>2</sup> Department of Internal Medicine, The University of Iowa, Iowa City, Iowa, United States of America

## Abstract

**Objective:** To investigate factors associated with engagement of U.S. Federal Health Agencies via Twitter. Our specific goals are to study factors related to a) numbers of retweets, b) time between the agency tweet and first retweet and c) time between the agency tweet and last retweet.

**Methods:** We collect 164,104 tweets from 25 Federal Health Agencies and their 130 accounts. We use negative binomial hurdle regression models and Cox proportional hazards models to explore the influence of 26 factors on agency engagement. Account features include network centrality, tweet count, numbers of friends, followers, and favorites. Tweet features include age, the use of hashtags, user-mentions, URLs, sentiment measured using Sentistrength, and tweet content represented by fifteen semantic groups.

**Results:** A third of the tweets (53,556) had zero retweets. Less than 1% (613) had more than 100 retweets (mean = 284). The hurdle analysis shows that hashtags, URLs and user-mentions are positively associated with retweets; sentiment has no association with retweets; and tweet count has a negative association with retweets. Almost all semantic groups, except for geographic areas, occupations and organizations, are positively associated with retweeting. The survival analyses indicate that engagement is positively associated with tweet age and the follower count.

**Conclusions:** Some of the factors associated with higher levels of Twitter engagement cannot be changed by the agencies, but others can be modified (e.g., use of hashtags, URLs). Our findings provide the background for future controlled experiments to increase public health engagement via Twitter.

**Citation:** Bhattacharya S, Srinivasan P, Polgreen P (2014) Engagement with Health Agencies on Twitter. PLoS ONE 9(11): e112235. doi:10.1371/journal.pone.0112235

**Editor:** Patrick S. Sullivan, Rollins School of Public Health, Emory University, United States of America

**Received:** April 7, 2014; **Accepted:** October 13, 2014; **Published:** November 7, 2014

**Copyright:** © 2014 Bhattacharya et al. This is an open-access article distributed under the terms of the Creative Commons Attribution License, which permits unrestricted use, distribution, and reproduction in any medium, provided the original author and source are credited.

**Data Availability:** The authors confirm that, for approved reasons, some access restrictions apply to the data underlying the findings. All relevant data are within the paper and its Supporting Information files.

**Funding:** These authors have no support or funding to report.

**Competing Interests:** The authors have declared that no competing interests exist.

\* Email: sanmitra-bhattacharya@uiowa.edu

‡ Current address: Linguamatics Solutions, Inc., Westborough, Massachusetts, United States of America

## Introduction

Government agencies are increasingly interested in using social media to distribute information at the national, state and local levels. U.S federal agencies, for example, routinely use a variety of social media sites including Twitter, Facebook, YouTube, Flickr, and Instagram to enhance communication [1]. In addition to distributing information, government agencies are increasingly interested in interacting with the populations they serve. For example, new guidelines entitled “Digital Governmental Strategy” outline specific steps for governmental agencies to make digital information more “customer centric” [2]. This bidirectional form of communication can be defined as engagement: interactions designed to promote some common goal [3].

To date no study has systematically explored factors associated with the levels of health agency engagement on social media. Our objective is to address this gap by using retweeting as a measure of engagement. Specifically we address the following three questions with respect to Twitter messages posted by US Federal Health agencies and their responses. First, which features are associated with the level of response in the form of retweets? Second, which

features are associated with the interval between an agency’s tweet and its first retweet? Third, which features are associated with the interval between an agency’s tweet and the last retweet it generates? We address our goals by analyzing an almost comprehensive set of tweets posted by the 130 Twitter accounts of 25 Federal Health Agencies. We explore associations between factors with level of retweeting using hurdle models. We explore the temporal factors related to our second and third questions using survival models. Factors we examine include standard features such as the number of friends and followers as well as less studied features relating to the semantic content of a tweet.

## Background and Significance

The U.S. government uses several social media services, but Twitter is one of the most commonly used service. Recent estimates indicate that approximately 18% of online adults use Twitter [4], and over 500 million users around the globe [5] generate over 500 million tweets per day [6]. Given the widespread use of Twitter and the fact that people are increasingly using it to share their experiences with illness and treatments as

**Table 1.** Features Examined.

| Type         | Group | Features                  | Description                                                                                                                     |
|--------------|-------|---------------------------|---------------------------------------------------------------------------------------------------------------------------------|
| Handle-level | 1     | Favorites                 | # of users favoriting tweets of a particular handle (log-transformed).                                                          |
|              | 1     | Followers                 | # of users following a particular handle (log-transformed).                                                                     |
|              | 1     | Friends                   | # of users followed by a particular handle (log-transformed).                                                                   |
|              | 1     | Betweenness-centrality    | Importance of node in network.                                                                                                  |
|              | 2     | Tweet count               | # of tweets posted by a handle in its lifetime (log-transformed).                                                               |
| Tweet-level  | 1     | Tweet age                 | # of days between handle creation and tweet post (log-transformed).                                                             |
|              | 2     | Hashtag                   | Whether a tweet contains a hashtag, word prefixed with # (binary).                                                              |
|              | 2     | URL                       | Whether a tweet contains an URL, http, ftp, etc. (binary).                                                                      |
|              | 2     | User-mention              | Whether a tweet contains a user-mention, word prefixed with @ (binary).                                                         |
|              | 2     | Sentiment                 | Two scores: one for positivity and another for negativity.                                                                      |
|              | 2     | Content (Semantic Groups) | Classification of each tweet into 15 semantic groups using MTI followed by post-processing. Multiple classes per tweet allowed. |

doi:10.1371/journal.pone.0112235.t001

well as other health concerns [7], Twitter provides a potentially valuable stream of health-related information. Several studies have used Twitter to discover adverse drug reactions [8,9], perform surveillance for disease activity [10,11] and health beliefs [12,13]. Twitter has also been used to investigate general health behavior [14,15]. However, few studies have focused on how health agencies use Twitter. The studies that do exist describe activity consistent with distributing information with little attention paid to engagement [16]. One of the few studies on engagement via Twitter focuses on levels of engagement: low (have followers), medium (promote retweeting) and high (have offline interactions) [3]. In contrast, to previous studies, our goal is to determine the *factors* associated with engagement of federal agencies with the “Twitter Public”. The caveat to note is that while we focus on public engagement an agency may be equally or even more interested in information dissemination alone.

We study factors related to engagement in terms of retweeting activity. A retweet is an acknowledgment that the original tweet has been read and also that it is viewed as sufficiently interesting to merit a re-post. The followers of the retweeting account now have access to the original retweet. Retweets are in some sense analogous to citations in an article. A second aspect of engagement relates to the time period over which retweeting occurs. A tweet with a longer retweeting time span compared to another is one where engagement occurs over a longer period of time. Thus, Twitter engagement for a federal agency is maximized when all of its tweets generate the highest possible number of retweets with retweets starting almost immediately after the tweet is posted and continuing on forever. While in practice these conditions are never achieved, it is clear that some tweets generate stronger responses than others. Our overarching goal is to determine whether there are features that relate to higher levels of retweeting and longer lifespans of tweets in order to offer insight into ways to gauge and strengthen Twitter engagement for health agencies.

## Methods

### Data Collection

**Agencies & Handles.** We selected health agencies through the HHS Social website, which maintains a list of all official HHS-affiliated accounts across various social media platforms [17]. We identified all agencies with Twitter accounts (also known as handles).

**Tweets & Retweets.** The Twitter REST API v1.1 [18] was used to collect all tweets from a handle’s timeline as of late November 2012 (data collection was done between 11/20/2012–11/21/2012). Using this method, a maximum of 3200 tweets from a handle’s timeline can be retrieved. These timelines extended from a few months (e.g., around 3 months for CDCSTD) to several years (e.g., around 3 years for NIGMS). On average the timeline was around 2 years for all handles. We could collect all posted tweets for 112 handles; 18 handles had more than 3200 tweets at the time of data collection so the data for these handles was censored. The average timeline for these handles also spanned around 2 years. Handles such as CDCSTD, womenshealth and CDCNPIN had posted over 9000 tweets by the time of the data collection. For such handles the most recent 3200 tweets were collected. For each agency tweet, we recorded its unique identifier and raw retweet count among other tweet-based data and metadata as described below.

### Tweet Features

First we decided which features we would use to represent each tweet. We included those examined commonly in Twitter-based studies as well as those that have not yet been considered. Table 1 lists 11 features we considered under 2 broad categories: handle-level features that are the same for all tweets issued by a handle (e.g., numbers of followers and friends) and tweet-specific features such as sentiment.

We also divided the features into two logical groups. Group 1 has features that cannot be changed or easily manipulated by an account holder. We include tweet age in this group as it represents a natural phenomenon. The account holder has control over Group 2 features.

Group 1 features include the number of followers, friends and favorites. If user Y is a follower of user X then it means that Y receives all of X’s tweets automatically. Also, X is regarded as a friend of Y. Relevant to us is that a tweet is displayed on the timelines of all of its handle’s followers, so these are the users most likely to retweet the post. The feature favorite is the number of users favoriting a particular handle. Twitter forms a network due to its follower and friend relationships between users. From this network, we calculate a betweenness-centrality score. This shows the extent to which a node acts as an intermediary in the shortest paths between nodes in the network; it indicates the importance of a particular node in the network structure.

We analyzed sentiment using a state-of-the-art lexicon-based sentiment classifier, SentiStrength [19,20]. SentiStrength has been widely applied for sentiment analysis of tweets [21] and has been shown to outperform other lexical classifiers [22]. SentiStrength classifies each tweet into positive and negative sentiments on a scale of  $+/-1$  (neutral) to  $+/-5$  (extreme).

One aspect of tweet analysis that is often overlooked in Twitter studies is the content of the tweets. The exception is in the few studies focused on specific domains (e.g., manual coding of 1,000 concussion-related tweets along 9 broad themes [23]). Content is important as some subjects may attract a broader audience than others. In order to analyze tweet content, we design a fully automated method for content analysis. Manual analysis is not feasible as it limits the number of tweets that can be content coded. We use the National Library of Medicine's Medical Text Indexer (MTI) [24,25] to assign Medical Subject Headings (MeSH) [26,27] recommendations for each tweet. MTI is commonly used for recommending MeSH terms to biomedical literature based on the titles and abstracts. It has been shown to be useful in other domains such as clinical text [25]. The terms recommended for each tweet are mapped into semantic types [28], which in turn are assigned to semantic groups [29,30]. Note that a particular tweet can be assigned to multiple semantic groups.

### Choice of Models

The number of retweets per tweet in our dataset is highly skewed with many zeros. This type of data distribution where the variance is much greater than the mean is described as over-dispersed [31] with zero-inflation [32]. Typically models such as Poisson or negative binomial regression are used to model count data. However the zero-inflation of the retweet count necessitates the use of two-part count data models such as the hurdle regression model [33–35].

Hurdle models have two separate components: a zero-portion to model the inflation of zero counts in the data and a count-portion to model the non-zero counts of the data. The zero-portion determines the binary outcome of whether a count is zero (no retweets) or not using a binomial probability model. The count portion of the model determines the conditional distribution of the non-zero count of the data using a zero-truncated negative binomial or Poisson model.

We formally compare different count data regression models (namely, the Poisson (P), negative binomial (NB), hurdle Poisson (HP) and hurdle negative binomial (HNB)) using standard goodness-of-fit measures [36,37]. The Poisson model is the hurdle Poisson model with the zero component ignored. Thus the Poisson model is 'nested' in the 'full' hurdle Poisson. Similarly the negative binomial is nested in the hurdle negative binomial model. Akaike information criterion (AIC) and Vuong statistics are used to compute goodness-of-fit for all pairs of nested and full models (e.g. NB vs. HP, HNB vs. NB, etc.). The HNB model had the lowest AIC value (800270.2) compared to the Poisson (2649779), negative binomial (813296.6) and hurdle Poisson (2274348) models, signifying a better fit. The Vuong statistics for hurdle negative binomial compared to Poisson, negative binomial and hurdle Poisson were 73.89, 14.43 and 59.36 respectively, all significant at  $p < 0.001$ . This signifies that hurdle negative binomial model has a better fit compared to the other models. Our comparison of full and nested models such as hurdle negative binomial and negative binomial using the likelihood ratio test (LRT) also corroborates to other goodness-of-fit measures in implying that the former model fits our data best.

In addition, we use methods from survival analysis [38,39], to model the temporal aspects of retweeting. Typically in survival

analysis we build models to analyze "time to events" such as death of an organism or failure of a machine [40]. In our case, we estimate two survival models. For the first model, the "event" refers to the time until the appearance of the first retweet. For the second model, the "event" is the time to the last retweet of a tweet – the length of time that the tweet is in "circulation". Similar to previous Twitter research [41] we use the Cox proportional hazards regression model [42] to predict how the different handle and tweet-based features influence the time to the first and last retweets.

## Results

### Tweets

A total of 134 Twitter accounts were identified out of which 4 were either deleted or suspended or had no tweets posted in their lifetime. We used the remaining 130 handles in our study. These correspond to 25 different health agencies that include ACF, AHRQ, CDC, CMS, FDA, HRSA, NIH, OIG, OS, SAMHSA and fifteen NIH subdivisions (NIA, NCCAM, NCI, NEI, NHLBI, NIAAA, NIAID, NIAIMS, NICRR, NIDA, NIEHS, NIGMS, NIHGRI, NIMH, NLM). Some agencies have quite a few handles such as NIH/NCI (13 handles: SmokefreeGove, NCIHINTS etc.), CDC (25 handles: CDCgov, CDCActEarly etc.), FDA (10 handles: US\_FDA, FDATobacco etc.), while others have just one handle such as AHRQ, ACF and NIH/NEI. Table 2 lists the various agencies (including their expanded names), the number of handles for each and a few examples of handles.

We collected a total of 164,104 tweets from the timelines of the 130 handles. A third of the tweets (53,556) had zero retweets, i.e., generated no observable engagement. Less than 1% (613) had more than 100 retweets (total = 174,395, mean = 284). The remaining two-thirds (109,935) of tweets fell between these ranges (total = 826,052, mean = 7.5). Table 3 shows summary details about tweets and retweets per agency.

In raw numbers we note that while the CDC posted the most tweets (37,136), it also has the highest raw number of tweets that are not retweeted (11,063). In contrast, the Office of the Secretary (OS), a close second in the number of total tweets (36,587), has the highest number of retweeted tweets (28,561) and also the highest number of retweets (376,158). Each tweet from OS gets approximately 10 retweets. The agency with the most retweets per retweeted tweet is NIH/NIMH with about 18 retweets per tweet. Also, it leads the agencies with 82% of its tweets retweeted at least once. Interestingly, this agency has less than 1000 tweets. Table 4 shows the top 10 handles ranked by the number of retweets per tweet. These are: CDCemergency (CDC), FitnessGov (OS), womenshealth (OS), HealthCareGov (OS), HHSGov (OS), FDArecalls (FDA), CDCgov (CDC), CDC\_eHealth (CDC), NIMHgov (NIH/NIMH), and PHEgov (OS).

88.46% of the retweeted tweets get their first retweet on the day of the tweet (referred to as day zero in our discussion). 60.6% of the retweeted tweets get their last retweet on day zero. Very few tweets receive their first tweet after 100 days. Similarly very few tweets get their last retweet after day 500.

We also study the power-law characteristics of different aspects of retweeting. With the exception of time to first retweet (power exponent = 1.87), we find retweets/tweet (exponent = 2.56), retweets/retweeter (exponent = 2.35) and time to last retweet (exponent = 2.33) have exponents in the range expected for power law distributions (between 2 and 3, with few exceptions). Concerning retweets/retweeter, we note that a few Twitter users retweet extensively (more than 500 times) while the majority of them retweet sparingly. Figure 1 shows these plots.

**Table 2.** Agencies and Handles.

| Agency             | Name                                                              | # handles  | Examples of handles                       |
|--------------------|-------------------------------------------------------------------|------------|-------------------------------------------|
| ACF                | Administration for Children & Families                            | 1          | HeadStartgov                              |
| AHRQ               | Agency for Healthcare Research & Quality                          | 1          | AHRQNews                                  |
| CDC                | Center for Disease Control & Prevention                           | 25         | CDCgov, CDCActEarly, CDC_BioSense, etc.   |
| CMS                | Centers for Medicare & Medicaid Services                          | 4          | CMSGov, CMSinnovates, IKNGov, etc.        |
| FDA                | U.S. Food & Drug Administration                                   | 10         | US_FDA, FDATobacco, FDADeviceInfo, etc.   |
| HRSA               | Health Resources & Services Administration                        | 1          | HRSAGov                                   |
| NIH                | National Institutes of Health                                     | 15         | NIHforFunding, NIHClinicalCntr, etc.      |
| NIH/NIA            | National Institute on Aging                                       | 1          | NIAGo4Life                                |
| NIH/NCCAM          | National Center for Complementary & Alternative Medicine          | 1          | NCCAM                                     |
| NIH/NCI            | National Cancer Institute                                         | 13         | SmokefreeGov, NCIHINTS, etc.              |
| NIH/NEI            | National Eye Institute                                            | 1          | NEHEP                                     |
| NIH/NHLBI          | National Heart, Blood & Lung Institute                            | 3          | TheHeartTruth, nih_nhlbi, BreatheBetter   |
| NIH/NIAAA          | National Institute of Alcohol Abuse & Alcoholism                  | 1          | NIAAAnews                                 |
| NIH/NIAID          | National Institute of Allergy & Infectious Diseases               | 3          | NIAIDNews, NIAIDCareers, NIAIDFunding     |
| NIH/NIAIMS         | National Institute of Arthritis & Musculoskeletal & Skin Diseases | 1          | NIH_NIAIMS                                |
| NIH/NICRR          | National Center for Research Resources                            | 1          | ncrr_nih_gov                              |
| NIH/NIDA           | National Institute of Drug Abuse                                  | 1          | NIDAnews                                  |
| NIH/NIEHS          | National Institute of Environmental Health Sciences               | 1          | NIEHS                                     |
| NIH/NIGMS          | National Institute of General Medical Sciences                    | 1          | NIGMS                                     |
| NIH/NIHGRI         | National Human Genome Research Institute                          | 1          | DNADay                                    |
| NIH/NIMH           | National Institute of Mental Health                               | 1          | NIMHgov                                   |
| NIH/NLM            | National Library of Medicine                                      | 11         | NLM_LHC, medlineplus, NCBI, etc.          |
| OIG                | Office of Inspector General                                       | 1          | OIGatHHS                                  |
| OS                 | Office of the Secretary                                           | 29         | AID5gov, bestbones4ever, BirdFluGov, etc. |
| SAMHSA             | The Substance Abuse & Mental Health Services                      | 2          | samhsagov, distressline                   |
| <b>Grand Total</b> |                                                                   | <b>130</b> |                                           |

doi:10.1371/journal.pone.0112235.t002

Concerning agencies, we find that 117 of the 130 HHS handles retweet each other's tweets. The top retweeting agencies are womenshealth with 2500 retweets followed by the NIH/NCI with 1662 retweets. MedicareGov, NCITechTransfer, NEHEP, NIAIDFunding and NIOSHManuf have the lowest retweet counts with 1 retweet each. Apart from these HHS handles, OrleansCoHealth, the Twitter handle of Orleans County Health Department (New York), has the highest retweeting activity with 3154 retweets.

### Tweet and Handle Features

Figure 2 shows a scatter plot of followers versus friends. We find that CDCemergency has the highest number of followers (1,432,424) but very few friends (393). On the other hand GoHealthyPeople has many friends (7,688) but few followers (34,913). NIAIDCareers (1008: 729) and distressline (1701: 1203) have relatively balanced number of followers and friends in comparison to the overall ratio of followers and friends for the different handles (49832: 405).

NLM\_DIMRC has the highest number (575) of favorites, followed by GoHealthyPeople (343) and AIDSgov (216). 50 handles (e.g. NHLBI, DNADay, NCBI) did not have any favorites.

The top ranking handles in tweet count are CDCSTD (12151), womenshealth (9419), CDCNPIN (9157), NIOSH (8936) and talkHIV (7663) and the lowest 5 are ncbi\_pubmed (60),

NCISymptomMgmt (144), NIOSH\_FirRanges (150), FDACBER (162), and Medicare\_Fraud (171).

NIHforHealth, CDCgov and HHSgov have the highest betweenness-centrality values of 987.2, 851.51 and 717.54 respectively. Betweenness-centrality does not apply to NIHforFunding and nlm\_newsroom as these are nodes with zero in- or out-degrees.

An overwhelming portion, 75% of tweets in our dataset contain URLs. Around 57% contain hashtags while 38% contain user-mentions.

Table 5 shows the distribution of tweets across sentiment scales. We find that in general slightly more tweets are classified as negative (percentage of moderate to extreme negative is 32.2% while for positive this percentage is 28.3%).

Table 6 shows the 15 semantic groups with examples of component semantic types and their prevalence in our dataset. "Concepts & Ideas" (41.68% tweets) is the most prevalent group followed by "Disorders" and "Living Beings" (around 36% for each). "Genes & Molecular Sequences" is least frequent (0.69%). Health agencies more often discuss concepts and ideas or disorders than amino acid and carbohydrate sequences.

We also compared the tweets posted by the health agencies with news in traditional media. The influence of traditional news sources on social media has been studied [43–45] but not in health. Google Health News is an aggregator that has been shown to be useful in infectious disease monitoring [46]. Gathering news

**Table 3.** Number of tweets and retweets per agency.

| Agency           | Date first handle was created | # tweets           | # of tweets with zero retweets | # tweets with at least 1 retweet | # retweets          | # retweets per tweet | # retweets per non-zero retweeted tweet |
|------------------|-------------------------------|--------------------|--------------------------------|----------------------------------|---------------------|----------------------|-----------------------------------------|
| ACF              | 9/7/2011                      | 605                | 219 (36.2%)                    | 386 (63.8%)                      | 1924                | 3.18                 | 4.98                                    |
| AHRQ             | 6/5/2009                      | 1475               | 415 (28.14%)                   | 1060 (71.86%)                    | 3432                | 2.33                 | 3.24                                    |
| CDC              | 7/24/2008                     | <b>37136</b>       | <b>11063 (29.79%)</b>          | 26073 (70.21%)                   | 278885              | 7.51                 | 10.70                                   |
| CMS              | 9/1/2009                      | 5620               | 2132 (37.94%)                  | 3488 (62.06%)                    | 11023               | 1.96                 | 3.16                                    |
| FDA              | 12/11/2008                    | 10574              | 3007 (28.44%)                  | 7567 (71.56%)                    | 75245               | 7.12                 | 9.94                                    |
| HRSA             | 6/1/2009                      | 1241               | 332 (26.75%)                   | 909 (73.25%)                     | 5391                | 4.34                 | 5.93                                    |
| NIH              | 6/16/2008                     | 15550              | 7446 (47.88%)                  | 8104 (52.12%)                    | 49666               | 3.19                 | 6.13                                    |
| NIH/NIA          | 10/18/2011                    | 1891               | 629 (33.26%)                   | 1262 (66.74%)                    | 10556               | 5.58                 | 8.36                                    |
| NIH/NCCAM        | 8/20/2009                     | 1489               | 568 (38.15%)                   | 921 (61.85%)                     | 4102                | 2.75                 | 4.45                                    |
| NIH/NCI          | 4/28/2009                     | 15679              | 5580 (35.59%)                  | 10099 (64.41%)                   | 46586               | 2.97                 | 4.61                                    |
| NIH/NEI          | 3/23/2011                     | 401                | 249 (62.09%)                   | 152 (37.91%)                     | 331                 | 0.83                 | 2.18                                    |
| NIH/NHLBI        | 2/26/2009                     | 5135               | 1526 (29.72%)                  | 3609 (70.28%)                    | 29447               | 5.73                 | 8.16                                    |
| NIH/NIAAA        | 7/15/2010                     | 424                | 122 (28.77%)                   | 302 (71.23%)                     | 2279                | 5.38                 | 7.55                                    |
| NIH/NIAID        | 7/24/2009                     | 1725               | 830 (48.12%)                   | 895 (51.88%)                     | 2808                | 1.63                 | 3.14                                    |
| NIH/NIAIMS       | 8/31/2009                     | 822                | 135 (16.42%)                   | 687 (83.58%)                     | 1850                | 2.25                 | 2.69                                    |
| NIH/NICRR        | 8/14/2009                     | 1029               | 704 (68.42%)                   | 325 (31.58%)                     | 515                 | 0.50                 | 1.58                                    |
| NIH/NIDA         | 1/5/2010                      | 2191               | 669 (30.53%)                   | 1522 (69.47%)                    | 7484                | 3.42                 | 4.92                                    |
| NIH/NIEHS        | 12/17/2009                    | 682                | 320 (46.92%)                   | 362 (53.08%)                     | 858                 | 1.26                 | 2.37                                    |
| NIH/NIGMS        | 9/2/2009                      | 983                | 420 (42.73%)                   | 563 (57.27%)                     | 1791                | 1.82                 | 3.18                                    |
| NIH/NIHGRI       | 2/25/2009                     | 401                | 180 (44.89%)                   | 221 (55.11%)                     | 652                 | 1.63                 | 2.95                                    |
| NIH/NIMH         | 5/11/2009                     | 959                | 177 (18.46%)                   | 782 (81.54%)                     | 16779               | 17.50                | 21.46                                   |
| NIH/NLM          | 2/12/2009                     | 15058              | 6525 (43.33%)                  | 8533 (56.67%)                    | 48497               | 3.22                 | 5.68                                    |
| OIG              | 5/2/2011                      | 1476               | 386 (26.15%)                   | 1090 (73.85%)                    | 2459                | 1.67                 | 2.26                                    |
| OS               | <b>5/30/2007</b>              | 36587              | 8026 (21.94%)                  | <b>28561 (78.06%)</b>            | <b>376158</b>       | 10.28                | 13.17                                   |
| SAMHSA           | 3/17/2009                     | 4971               | 1896 (38.14%)                  | 3075 (61.86%)                    | 21729               | 4.37                 | 7.07                                    |
| <b>Total</b>     |                               | 164104             | 53556 (32.64%)                 | 110548 (67.36%)                  | 1000447             | 6.10                 | 9.05                                    |
| <b>Mean (SD)</b> |                               | 6564.16 (10355.66) | 2142.24 (3055.12)              | 4421.92 (7499.23)                | 40017.88 (89880.72) | 4.10 (3.64)          | 5.99 (4.39)                             |

Bolded values indicate the largest values for the column.  
doi:10.1371/journal.pone.0112235.t003

**Table 4.** Top 10 agency handles for most retweets per tweet.

| Handle        | Date of creation | # tweets    | # of tweets with non-zero retweets | # of tweets with zero retweets | # retweets   | # retweets per non-zero retweeted tweet |
|---------------|------------------|-------------|------------------------------------|--------------------------------|--------------|-----------------------------------------|
| CDCemergency  | 1/28/2009        | 792         | 523 (66.04%)                       | 269 (33.96%)                   | 36756        | <b>70.28</b>                            |
| FitnessGov    | 9/15/2011        | 935         | 834 (89.2%)                        | 101 (10.8%)                    | 23003        | 27.58                                   |
| womenshealth  | 5/30/2007        | <b>3236</b> | <b>3163 (97.74%)</b>               | 73 (2.26%)                     | <b>85832</b> | 27.14                                   |
| HealthCareGov | 11/1/2009        | 409         | 404 (98.78%)                       | 5 (1.22%)                      | 10315        | 25.53                                   |
| HHSGov        | 6/4/2009         | 1295        | 1103 (85.17%)                      | 192 (14.83%)                   | 26313        | 23.86                                   |
| FDARECALLS    | 12/11/2008       | 2118        | 1278 (60.34%)                      | <b>840 (39.66%)</b>            | 29764        | 23.29                                   |
| CDCgov        | 5/21/2010        | 3226        | 2904 (90.02%)                      | 322 (9.98%)                    | 66204        | 22.80                                   |
| CDC_eHealth   | 7/24/2008        | 1517        | 1255 (82.73%)                      | 262 (17.27%)                   | 27856        | 22.20                                   |
| NIMHgov       | 5/11/2009        | 959         | 782 (81.54%)                       | 177 (18.46%)                   | 16779        | 21.46                                   |
| PHEgov        | 4/26/2010        | 1356        | 998 (73.6%)                        | 358 (26.4%)                    | 20683        | 20.72                                   |

Bolded values indicate the largest values for the column.  
doi:10.1371/journal.pone.0112235.t004

from it we find surprisingly little overlap with agency tweets. Only 1601 tweets (<1% of the total) overlap with news headlines. Of these, tweets and news appear on the same day in 320 cases, tweets precede news in 610 cases and news precedes tweet in 671 cases.

Our results with health agency tweets is consistent with previous studies finding topics discussed in Twitter to be considerably different from traditional news sources [43].

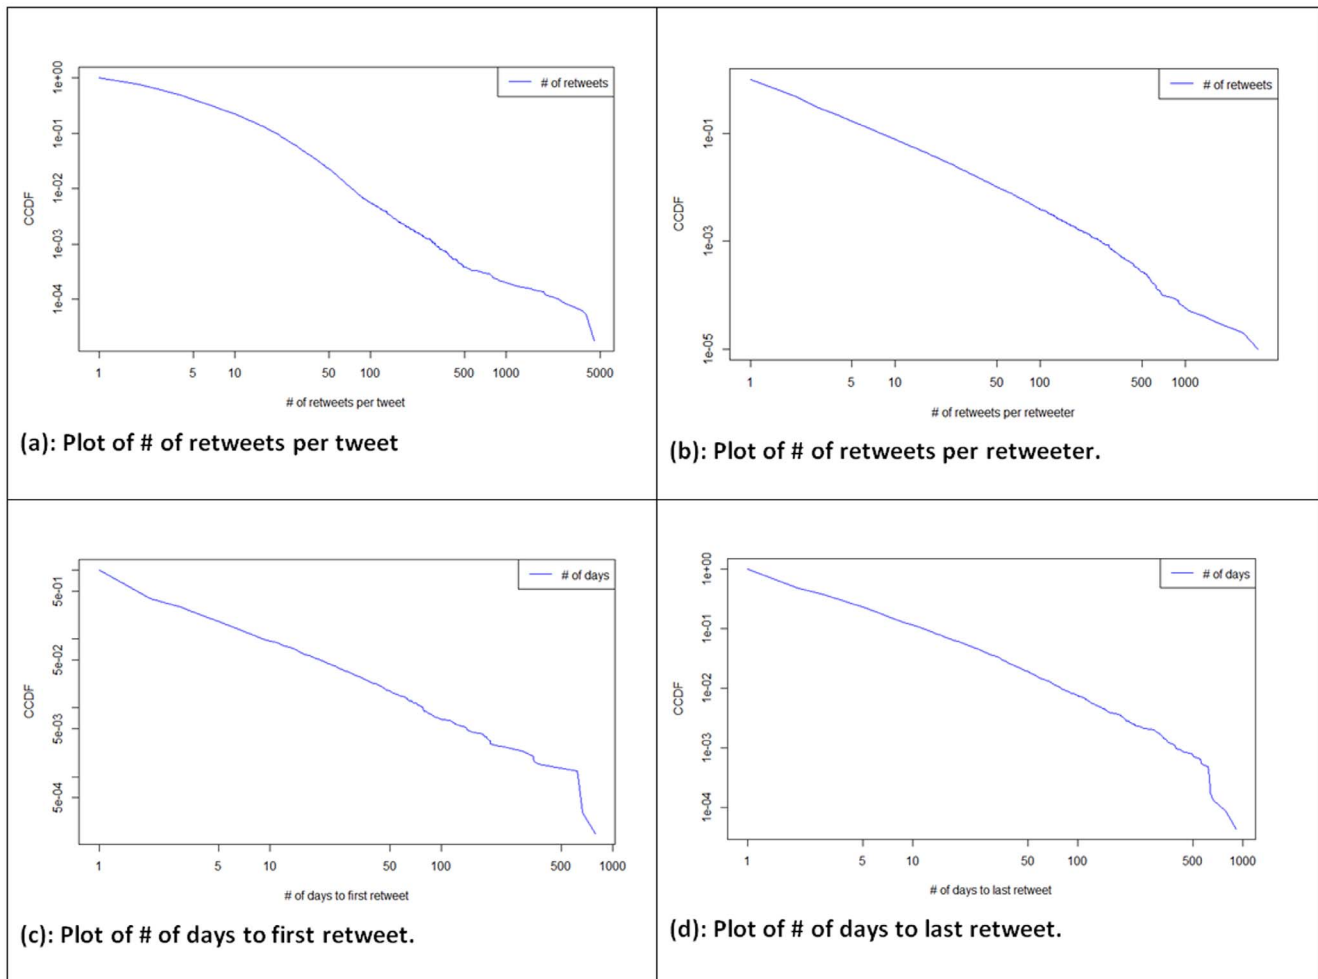

**Figure 1. Power law plots of (a) retweets/tweet, (b) #retweets/retweeter, (c) #days to first retweet and (d) #days to last retweet.**  
doi:10.1371/journal.pone.0112235.g001

### Plot of followers vs. friends for each handle

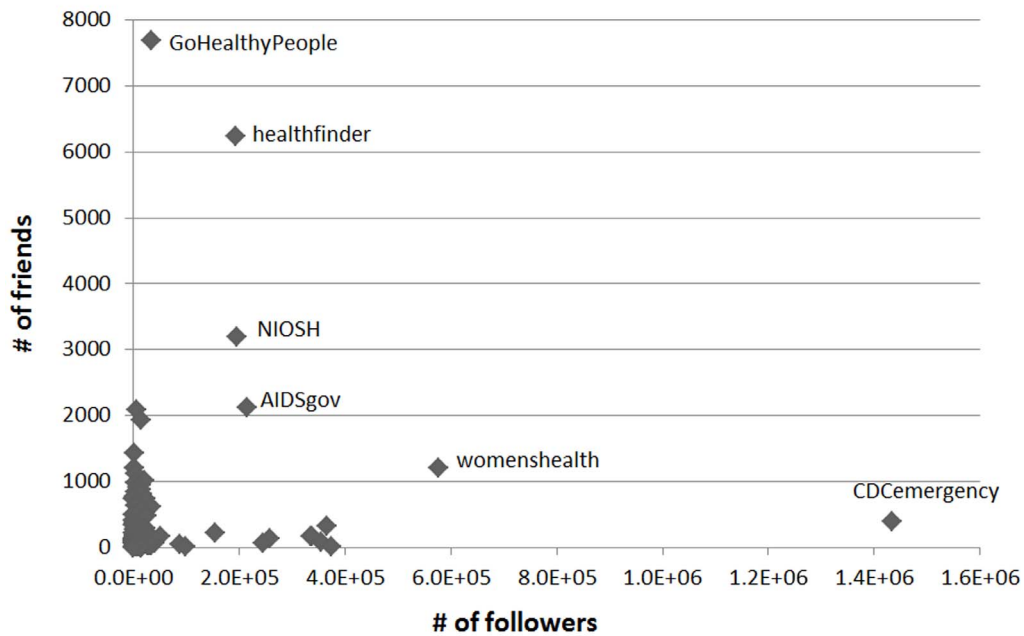

**Figure 2. Plot of # of followers vs. # of friends for each handle.** Few handles with disparate distribution of followers and friends have been labeled.  
doi:10.1371/journal.pone.0112235.g002

#### Hurdle Model Analysis of Tweets

Results from the hurdle model are given in Table 7. But first, an important assumption in multiple regression analysis is that the variables used in the statistical models are independent of each other i.e. multicollinearity should not exist among them. We use the variance inflation factor (VIF) to check for the presence of multicollinearity in our experiments. VIF scores for all independent variables in our regression analysis were within the range of zero to 5 indicating no multicollinearity issues.

For the zero portion of the hurdle model – modeling whether a retweet occurs or not – increases in the number of favorites and followers are positively associated with retweets, as is tweet age. Tweet count, however, is negatively associated with retweets. Hashtags, URLs and user-mentions – are positively associated with retweets. Both positive and negative sentiments are associated with a lower probability of retweeting. Almost all semantic groups, except for geographic areas, occupations and organizations, are positively associated with retweeting.

For the count portion of the hurdle model – modeling the number of retweets – the results are similar to those of the zero

portion with a few exceptions: friend count, which was insignificant in the zero portion, is negatively associated with number of retweets. Hashtags and URLs are negatively associated with the number of retweets. Also, some semantic groups are negatively associated with retweet counts, but positively associated with whether or not a retweet occurred, specifically anatomy, devices, genes & molecular sequences and procedures.

#### Cox Models of Tweets

We estimated two Cox proportional hazards models. First, we modeled time to first retweet, and the results are presented in Table 8. In this case, shorter time periods are preferred. Time to retweet is shorter for handles that have more favorites and followers. It is also shorter for tweets with longer tweet age and the presence of hashtags. Time to retweet is longer for increases in friend count, user-mentions, and positive sentiment. Most of the semantic groups are not associated with time to first retweet.

Second, we modeled the time to the last retweet, and the results are presented in Table 9. In this case, longer time periods are preferred. Longer time to the last retweet is associated with the

**Table 5. Distribution of positive and negative sentiments for tweets on a 5-point scale.**

|                 | # of positive tweets | # of negative tweets |
|-----------------|----------------------|----------------------|
| neutral         | 117599 (71.66%)      | 111233 (67.78%)      |
| moderate-medium | 36940 (22.51%)       | 31791 (19.37%)       |
| medium          | 8502 (5.18%)         | 10143 (6.18%)        |
| medium-extreme  | 1051 (0.64%)         | 10772 (6.56%)        |
| extreme         | 12 (0.01%)           | 165 (0.10%)          |
| <b>Total</b>    | <b>164104</b>        | <b>164104</b>        |

doi:10.1371/journal.pone.0112235.t005

**Table 6.** Semantic groups with examples of component semantic types and their prevalence in the dataset.

| Semantic Groups             | Example Semantic Types                                                                   | # of tweets (%) |
|-----------------------------|------------------------------------------------------------------------------------------|-----------------|
| Concepts & Ideas            | Functional Concept, Regulation or Law, Temporal Concept, etc.                            | 68391 (41.68%)  |
| Disorders                   | Anatomical Abnormality, Disease or Syndrome, Neoplastic Process, etc.                    | 59164 (36.05%)  |
| Living Beings               | Mammal, Eukaryote, Plant, etc.                                                           | 57836 (35.24%)  |
| Geographic Areas            | Geographic Area                                                                          | 42133 (25.67%)  |
| Chemicals & Drugs           | Clinical Drug, Organic Chemical, Enzyme, etc.                                            | 39065 (23.81%)  |
| Activities & Behaviors      | Daily or Recreational Activity, Machine Activity, Social Behavior, etc.                  | 38276 (23.32%)  |
| Organizations               | Health Care Related Organization, Professional Society, Self-help or Relief Organization | 35163 (21.43%)  |
| Physiology                  | Cell Function, Mental Process, Organ or Tissue Function, etc.                            | 32308 (19.69%)  |
| Objects                     | Entity, Food, Manufactured Object, etc.                                                  | 23452 (14.29%)  |
| Procedures                  | Diagnostic Procedure, Research Activity, Therapeutic or Preventive Procedure, etc.       | 23445 (14.29%)  |
| Phenomena                   | Biologic Function, Human-caused Phenomenon or Process, Natural Phenomenon or Process     | 20252 (12.34%)  |
| Anatomy                     | Anatomical Structure, Cell Component, Tissue, etc.                                       | 7925 (4.83%)    |
| Occupations                 | Biomedical Occupation or Discipline, Occupation or Discipline                            | 7633 (4.65%)    |
| Devices                     | Drug Delivery Device, Medical Device, Research Device                                    | 1610 (0.98%)    |
| Genes & Molecular Sequences | Amino Acid Sequence, Carbohydrate Sequence, Gene or Genome, etc.                         | 1138 (0.69%)    |

doi:10.1371/journal.pone.0112235.t006

handle's follower count, the presence of a URL in the tweet, and positive sentiment. Handles with more favorites, higher tweet count, and increased betweenness-centrality, as well as tweets with user-mention, hashtags and negative sentiment have shorter times to last retweet.

## Discussion

Our results show that although multiple federal health agencies are using Twitter, there is a great deal of difference between levels of Twitter use and also retweets. For public health agencies, we found that a tiny minority of tweets gets more than 100 retweets; a two-thirds majority of tweets get on average 8 retweets. We also found that a handle's follower count and favorite count have strong positive relationships with retweeting behavior. While these features are not easy for agencies to improve, they are easy metrics to follow. In contrast, we found that having more friends on Twitter was negatively associated with the number of times a tweet is retweeted.

Early adoption of Twitter by an agency is associated with our measures of engagement. As a handle ages the chances for engagement overall seem to improve. This is consistent with findings in the general Twitter domain [47]. This is not something that agencies can change but it does provide support for health agencies thinking about starting Twitter accounts to do just that and not to wait and delay getting started.

Agencies generating more tweets than others do not necessarily have more retweets. In fact, we found that tweet count, the number of tweets posted overall, is negatively associated with retweets. This is consistent with anecdotal evidence from the web [48,49]. This suggests that an agency might consider only tweeting posts that it regards as important so as to not 'dilute' the public's attention. However, this observation must be balanced against the fact that information dissemination on a topic may be an organization's main goal and not necessarily public response. In that case regular or even frequent postings related to a message may be appropriate.

Health agencies can augment their tweets by adding hashtags, URLs, or user-mentions and this may increase the likelihood that users will find the information encoded in the tweet more useful and thus retweet it. Indeed, we found that the addition of hashtags, URLs, or user-mentions did indeed increase the likelihood that a given tweet would be retweeted. However, the inclusion of hashtags and URLs is also associated with decreased numbers of retweets, and user-mentions are associated with shorter times to last retweet. Thus, agencies may be able to increase retweets by using these conventions, but they might not increase the longevity of tweets. Our user-mentions results are in slight contrast to previous research, which found these to have (marginally significant) *negative* associations with retweeting [47]. But our results for hashtags and URLs are generally consistent with previous results [47,50].

Our observations regarding hashtags, user-mentions and URLs are also interesting because of differences in their prevalence between our dataset and Twitter data in general. The agency tweets in this paper use more URLs than found in the general domain, 75% vs. 19% [51] and 21% [47]. We speculate that this abundance of URLs for tweets from health agencies may be because in health communications references to sources and supporting materials are necessary. This is supported by another study on the use of Twitter by local health departments where the authors found 74% of tweets contain URLs [52]. Hashtags and user-mentions are also more prevalent in our dataset appearing in 57% and 38% of agency tweets respectively, while in the general domain hashtags were found in only 16% and user-mentions in only 20% of tweets [52].

Betweenness-centrality is positively related to the number of retweets and negatively related to the time to last retweet. While betweenness-centrality has been used extensively in social media research in various domains ranging from health to politics [53–56], in most cases it is used as a metric of influence in a retweet or a reply network. To the best of our knowledge, researchers have not explored the direct association of betweenness centrality scores



**Table 7.** Results of hurdle negative binomial model showing the estimate/coefficient (SE), exponent of coefficient (OR and IRR), z and p-values (\*p<0.05, \*\*p<0.01, \*\*\*p<0.001) for various independent variables for zero and count portions of the model.

|                                        | Zero Portion         |              |               | Count Portion |                      |              |               |     |
|----------------------------------------|----------------------|--------------|---------------|---------------|----------------------|--------------|---------------|-----|
|                                        | Estimate (SE)        | OR           | z value       | p             | Estimate (SE)        | IRR          | z value       | p   |
| (Intercept)                            | -3.295 (0.05)        | 0.037        | -65.69        | ***           | -1.361 (0.053)       | 0.256        | -25.89        | *** |
| Log-transformed Favorite Count         | <b>0.207 (0.009)</b> | <b>1.23</b>  | <b>23.668</b> | ***           | <b>0.074 (0.009)</b> | <b>1.077</b> | <b>8.025</b>  | *** |
| Log-transformed Follower Count         | <b>0.922 (0.012)</b> | <b>2.515</b> | <b>74.148</b> | ***           | <b>0.939 (0.011)</b> | <b>2.559</b> | <b>85.831</b> | *** |
| Log-transformed Friend Count           | 0.002 (0.012)        | 1.002        | 0.168         |               | -0.181 (0.013)       | 0.835        | -13.717       | *** |
| Log-transformed Tweet Count            | -1.242 (0.02)        | 0.289        | -61.38        | ***           | -0.712 (0.019)       | 0.491        | -37.481       | *** |
| Log-transformed betweenness-centrality | 0.016 (0.01)         | 1.016        | 1.679         |               | <b>0.099 (0.01)</b>  | <b>1.105</b> | <b>10.347</b> | *** |
| Log-transformed tweet age              | <b>1.108 (0.016)</b> | <b>3.029</b> | <b>69.973</b> | ***           | <b>0.12 (0.018)</b>  | <b>1.128</b> | <b>6.539</b>  | *** |
| Hashtag                                | <b>0.386 (0.012)</b> | <b>1.471</b> | <b>32.662</b> | ***           | -0.034 (0.011)       | 0.966        | -3.01         | **  |
| URL                                    | <b>0.529 (0.014)</b> | <b>1.697</b> | <b>38.084</b> | ***           | -0.08 (0.014)        | 0.923        | -5.581        | *** |
| User-mention                           | <b>0.229 (0.012)</b> | <b>1.257</b> | <b>18.355</b> | ***           | <b>0.869 (0.012)</b> | <b>2.385</b> | <b>72.131</b> | *** |
| Positive Sentiment                     | -0.08 (0.009)        | 0.923        | -8.473        | ***           | -0.016 (0.01)        | 0.984        | -1.695        |     |
| Negative Sentiment                     | -0.141 (0.008)       | 0.868        | -18.747       | ***           | -0.056 (0.007)       | 0.945        | -8.222        | *** |
| Activities & Behaviors                 | <b>0.32 (0.014)</b>  | <b>1.377</b> | <b>22.869</b> | ***           | <b>0.175 (0.013)</b> | <b>1.191</b> | <b>13.213</b> | *** |
| Anatomy                                | <b>0.195 (0.028)</b> | <b>1.215</b> | <b>6.959</b>  | ***           | -0.05 (0.025)        | 0.951        | -2.026        | *   |
| Chemicals & Drugs                      | <b>0.105 (0.014)</b> | <b>1.11</b>  | <b>7.675</b>  | ***           | <b>0.141 (0.013)</b> | <b>1.151</b> | <b>10.82</b>  | *** |
| Concepts & Ideas                       | <b>0.235 (0.012)</b> | <b>1.265</b> | <b>19.933</b> | ***           | -0.022 (0.011)       | 0.978        | -1.94         |     |
| Devices                                | <b>0.273 (0.059)</b> | <b>1.314</b> | <b>4.653</b>  | ***           | -0.226 (0.054)       | 0.797        | -4.224        | *** |
| Disorders                              | <b>0.278 (0.014)</b> | <b>1.32</b>  | <b>20.516</b> | ***           | <b>0.177 (0.013)</b> | <b>1.193</b> | <b>13.909</b> | *** |
| Genes & Molecular Sequences            | 0.058 (0.071)        | 1.059        | 0.812         |               | -0.952 (0.065)       | 0.386        | -14.674       | *** |
| Geographic Areas                       | -0.037 (0.018)       | 0.964        | -1.986        | *             | -0.324 (0.018)       | 0.723        | -18.216       | *** |
| Living Beings                          | <b>0.083 (0.012)</b> | <b>1.086</b> | <b>6.643</b>  | ***           | <b>0.082 (0.012)</b> | <b>1.085</b> | <b>6.927</b>  | *** |
| Objects                                | <b>0.14 (0.017)</b>  | <b>1.15</b>  | <b>8.331</b>  | ***           | <b>0.192 (0.016)</b> | <b>1.212</b> | <b>11.979</b> | *** |
| Occupations                            | -0.057 (0.027)       | 0.945        | -2.146        | *             | -0.134 (0.027)       | 0.875        | -5            | *** |
| Organizations                          | -0.107 (0.02)        | 0.899        | -5.394        | ***           | -0.24 (0.019)        | 0.786        | -12.683       | *** |
| Phenomena                              | <b>0.07 (0.018)</b>  | <b>1.073</b> | <b>3.939</b>  | ***           | <b>0.436 (0.017)</b> | <b>1.547</b> | <b>25.043</b> | *** |
| Physiology                             | <b>0.188 (0.015)</b> | <b>1.207</b> | <b>12.465</b> | ***           | <b>0.311 (0.014)</b> | <b>1.365</b> | <b>22.106</b> | *** |
| Procedures                             | <b>0.046 (0.017)</b> | <b>1.047</b> | <b>2.733</b>  | **            | -0.082 (0.016)       | 0.921        | -5.157        | *** |
| Log(theta)                             |                      |              |               |               | -1.8 (0.024)         | 0.165        | -73.547       | *** |

Italicized rows: variables with significant negative association, bolded rows: variables with significant positive association. The Zero Portion is a model of whether or not there is a retweet and the Count Portion models the number of retweets.

doi:10.1371/journal.pone.0112235.t007

**Table 8.** Results of Cox proportional hazards model for interval between a tweet and its first retweet.

|                                | Interval Between Tweet and First Retweet |              |               |            |
|--------------------------------|------------------------------------------|--------------|---------------|------------|
|                                | Coefficient (SE)                         | HR           | z             | p          |
| Log-transformed Favorite Count | <b>0.055 (0.006)</b>                     | <b>1.056</b> | <b>8.72</b>   | <b>***</b> |
| Log-transformed Follower Count | <b>0.102 (0.009)</b>                     | <b>1.107</b> | <b>11.029</b> | <b>***</b> |
| Log-transformed Friend Count   | <i>-0.026 (0.009)</i>                    | <i>0.974</i> | <i>-2.929</i> | <b>**</b>  |
| Log-transformed betweenness    | <i>-0.004 (0.008)</i>                    | <i>0.995</i> | <i>-0.566</i> |            |
| Log-transformed Tweet Count    | <i>0.017 (0.015)</i>                     | <i>1.017</i> | <i>1.176</i>  |            |
| Log-transformed tweet age      | <b>0.089 (0.012)</b>                     | <b>1.093</b> | <b>7.204</b>  | <b>***</b> |
| Hashtag                        | <b>0.116 (0.009)</b>                     | <b>1.123</b> | <b>12.873</b> | <b>***</b> |
| URL                            | <i>-0.021 (0.011)</i>                    | <i>0.978</i> | <i>-1.907</i> | .          |
| User-mention                   | <i>-0.072 (0.01)</i>                     | <i>0.930</i> | <i>-7.186</i> | <b>***</b> |
| Positive Sentiment             | <i>-0.02 (0.007)</i>                     | <i>0.979</i> | <i>-2.807</i> | <b>**</b>  |
| Negative Sentiment             | <i>-0.001 (0.005)</i>                    | <i>0.998</i> | <i>-0.284</i> |            |
| Activities & Behaviors         | <i>0.008 (0.01)</i>                      | <i>1.008</i> | <i>0.827</i>  |            |
| Anatomy                        | <i>0.001 (0.019)</i>                     | <i>1.001</i> | <i>0.077</i>  |            |
| Chemicals & Drugs              | <i>0.013 (0.01)</i>                      | <i>1.013</i> | <i>1.347</i>  |            |
| Concepts & Ideas               | <i>0.008 (0.009)</i>                     | <i>1.008</i> | <i>0.954</i>  |            |
| Devices                        | <i>-0.009 (0.04)</i>                     | <i>0.990</i> | <i>-0.231</i> |            |
| Disorders                      | <b>0.02 (0.01)</b>                       | <b>1.020</b> | <b>2.037</b>  | <b>*</b>   |
| Genes & Molecular Sequences    | <i>0.051 (0.047)</i>                     | <i>1.052</i> | <i>1.085</i>  |            |
| Geographic Areas               | <i>-0.033 (0.014)</i>                    | <i>0.967</i> | <i>-2.296</i> | <b>*</b>   |
| Living Beings                  | <i>0.006 (0.009)</i>                     | <i>1.006</i> | <i>0.667</i>  |            |
| Objects                        | <i>0 (0.012)</i>                         | <i>0.999</i> | <i>-0.033</i> |            |
| Occupations                    | <i>-0.02 (0.02)</i>                      | <i>0.980</i> | <i>-0.998</i> |            |
| Organizations                  | <i>0.006 (0.015)</i>                     | <i>1.006</i> | <i>0.416</i>  |            |
| Phenomena                      | <i>0.021 (0.013)</i>                     | <i>1.021</i> | <i>1.596</i>  |            |
| Physiology                     | <i>0.009 (0.011)</i>                     | <i>1.009</i> | <i>0.827</i>  |            |
| Procedures                     | <b>0.024 (0.012)</b>                     | <b>1.024</b> | <b>2.006</b>  | <b>*</b>   |

The Coefficients (SE), hazard ratios (HR), z and p-values (\*p<0.05, \*\*p<0.01, \*\*\*p<0.001) for the independent variables are shown. Italicized rows: variables with significant negative association, bolded rows: variables with significant positive association.  
doi:10.1371/journal.pone.0112235.t008

to retweeting activity. We speculate that since we calculated betweenness-centrality based on the follower-following network among agencies, an agency with high betweenness-centrality, i.e. following many other federal agencies, may not have any major effect on the rate or lifespan of retweets.

Much work has been done involving mining sentiment from Twitter and it has previously been demonstrated that the presence of sentiment of one kind or the other is associated with higher rates of retweeting [57–59]. In contrast, we found that sentiment in tweets from government agencies, either positive or negative, is not associated with retweeting. It should also be noted that agency tweets are predominantly neutral (70%).

Semantic groups have not been studied in the context of retweet rates. We found that posts about activities and behaviors, chemicals and drugs, disorders, living beings, objects, phenomenon and physiology are positively associated with engagement. In contrast, posts about organizations, occupations, genes & sequences and geographic areas tend to lower engagement. But it may also be that the intent behind such posts are less to engage and more to just inform.

## Limitations

Our study has a few limitations. First, it is comprised of observational data; i.e., we did not run formal experiments. Thus although we can describe associations, we cannot establish causality. For example, while we find that the number of followers is associated with retweeting, we cannot insure, due to the descriptive nature of the study, that increasing the number of followers will lead to an increase in retweets. Second, although we captured the majority of tweets from federal agencies we could only collect a maximum of 3200 for each handle, so for a few of these agency handles (18/130), our data was censored. Nevertheless, we still had a large corpus of tweets over a long period of time. Third, the intent behind some tweets may simply be to inform and not necessarily to engage via retweeting. We do not know about an organization's motivations for tweeting or for posting specific tweets or the targeted audience. Furthermore, some agencies may have more information that naturally draws the public. Thus, these results do not represent a "report card" on these agencies. Fourth, our definition of engagement is limited to examining retweeting and its features. Fifth, although we considered various important and typically used tweet-based features in our statistical

**Table 9.** Results of Cox proportional hazards model for interval between a tweet and its last retweet.

|                                | Interval Between Tweet and Last Retweet |              |                |            |
|--------------------------------|-----------------------------------------|--------------|----------------|------------|
|                                | Coefficient (SE)                        | HR           | z              | p          |
| Log-transformed Favorite Count | <b>0.037 (0.006)</b>                    | <b>1.037</b> | <b>5.912</b>   | <b>***</b> |
| Log-transformed Follower Count | <i>-0.27 (0.009)</i>                    | <i>0.763</i> | <i>-29.249</i> | <b>***</b> |
| Log-transformed Friend Count   | <i>-0.009 (0.009)</i>                   | <i>0.991</i> | <i>-0.972</i>  |            |
| Log-transformed Tweet Count    | <b>0.351 (0.015)</b>                    | <b>1.420</b> | <b>23.994</b>  | <b>***</b> |
| Log-transformed tweet age      | <i>-0.014 (0.012)</i>                   | <i>0.986</i> | <i>-1.124</i>  |            |
| Log-transformed betweenness    | <b>0.036 (0.008)</b>                    | <b>1.036</b> | <b>4.832</b>   | <b>***</b> |
| Hashtag                        | <b>0.139 (0.009)</b>                    | <b>1.149</b> | <b>15.519</b>  | <b>***</b> |
| URL                            | <i>-0.179 (0.011)</i>                   | <i>0.835</i> | <i>-15.915</i> | <b>***</b> |
| User-mention                   | <b>0.094 (0.01)</b>                     | <b>1.098</b> | <b>9.355</b>   | <b>***</b> |
| Positive Sentiment             | <i>-0.025 (0.007)</i>                   | <i>0.975</i> | <i>-3.411</i>  | <b>***</b> |
| Negative Sentiment             | <b>0.037 (0.005)</b>                    | <b>1.037</b> | <b>7.049</b>   | <b>***</b> |
| Activities & Behaviors         | <i>-0.043 (0.01)</i>                    | <i>0.957</i> | <i>-4.265</i>  | <b>***</b> |
| Anatomy                        | <i>-0.038 (0.019)</i>                   | <i>0.962</i> | <i>-1.961</i>  | *          |
| Chemicals & Drugs              | <i>-0.019 (0.01)</i>                    | <i>0.981</i> | <i>-1.936</i>  |            |
| Concepts & Ideas               | <i>-0.011 (0.009)</i>                   | <i>0.989</i> | <i>-1.262</i>  |            |
| Devices                        | <i>-0.059 (0.04)</i>                    | <i>0.942</i> | <i>-1.471</i>  |            |
| Disorders                      | <i>-0.011 (0.01)</i>                    | <i>0.988</i> | <i>-1.156</i>  |            |
| Genes & Molecular Sequences    | <i>0.059 (0.047)</i>                    | <i>1.060</i> | <i>1.252</i>   |            |
| Geographic Areas               | <i>0.001 (0.014)</i>                    | <i>1.000</i> | <i>0.04</i>    |            |
| Living Beings                  | <i>-0.006 (0.009)</i>                   | <i>0.993</i> | <i>-0.721</i>  |            |
| Objects                        | <i>-0.049 (0.012)</i>                   | <i>0.951</i> | <i>-3.993</i>  | <b>***</b> |
| Occupations                    | <b>0.04 (0.02)</b>                      | <b>1.040</b> | <b>1.977</b>   | *          |
| Organizations                  | <b>0.041 (0.015)</b>                    | <b>1.041</b> | <b>2.687</b>   | <b>**</b>  |
| Phenomena                      | <i>-0.012 (0.013)</i>                   | <i>0.987</i> | <i>-0.928</i>  |            |
| Physiology                     | <i>-0.013 (0.011)</i>                   | <i>0.986</i> | <i>-1.189</i>  |            |
| Procedures                     | <i>0.017 (0.012)</i>                    | <i>1.016</i> | <i>1.388</i>   |            |

The Coefficients (SE), hazard ratios (HR), z and p-values (\*p<0.05, \*\*p<0.01, \*\*\*p<0.001) for the independent variables are shown. Italicized rows: variables with significant negative association, bolded rows: variables with significant positive association.  
doi:10.1371/journal.pone.0112235.t009

analysis, there may be other key features. For example, while time or day of the week may have significant effects on tweeting or retweeting behavior [60,61] and hence engagement, these features were considered outside the scope of our study. We also did not examine the features of the retweet. For example, a retweet may agree with or contradict the message in the source tweet. Finally we limit our analysis to Twitter, and there are other social network platforms that federal agencies are using.

## Conclusions

We present the first comprehensive analyses of Twitter engagement by public health agencies. The level of Twitter activity varies greatly by health agency: some health accounts are very active and others are not as much. However, it seems to be the content of the Tweets (e.g., about activities and behaviors, disorders) and not the number of tweets alone that is associated with a higher level of engagement (number of retweets). Furthermore, although some of the factors associated with more

engagement cannot be changed by the agency (e.g., the length of time they have been active on Twitter), several factors associated with higher retweets can be controlled (e.g., use of hashtags, URLs). Our results provide a framework for future experiments designed to improve the public's engagement with health agencies via Twitter.

## Supporting Information

**Data S1 List of Twitter handles of 130 HHS health agencies used in this paper.**  
(TXT)

## Author Contributions

Conceived and designed the experiments: SB PS PP. Performed the experiments: SB PS. Analyzed the data: SB PS. Contributed reagents/materials/analysis tools: SB PS. Wrote the paper: SB PS PP.

## References

- Government & Social Media Wiki. Available: [http://govsm.com/w/Federal\\_Agencies](http://govsm.com/w/Federal_Agencies). Accessed 2012 Nov 1.
- Social Media Metrics for Federal Agencies. Available: <http://www.howto.gov/social-media/using-social-media-in-government/metrics-for-federal-agencies>. Accessed 2013 Apr 1.
- Neiger BL, Thackeray R, Burton SH, Giraud-Carrier CG, Fagen MC (2013) Evaluating Social Media's Capacity to Develop Engaged Audiences in Health Promotion Settings Use of Twitter Metrics as a Case Study. *Health Promot Pract* 14(2): 157–162.
- Pew Research Center's Internet & American Life Project. Available: <http://pewinternet.org/Reports/2013/social-networking-sites.aspx>. Accessed 2013 Nov 1.
- New Tweets per second record, and how! Available: <https://blog.twitter.com/2013/new-tweets-per-second-record-and-how>. Accessed 2013 Nov 1.
- Countdown to 500 million registered Twitter accounts. Available: <http://twopcharts.com/twitter500million.php>. Accessed 2013 Apr 1.
- Social media and health care: opportunities and obstacles. Available: <http://www.pwc.com/us/en/health-industries/publications/health-care-social-media.jhtml>. Accessed 2013 Nov 1.
- Bian J, Topaloglu U, Yu F (2012) Towards large-scale twitter mining for drug-related adverse events. Proceedings of the 2012 international workshop on Smart health and wellbeing (SHB '12), pp. 25–32.
- Jiang K, Zheng Y (2013) Mining Twitter Data for Potential Drug Effects. *Advanced Data Mining and Applications*: Springer Berlin Heidelberg, pp. 434–443.
- Signorini A, Segre AM, Polgreen PM (2011) The use of Twitter to track levels of disease activity and public concern in the US during the influenza A H1N1 pandemic. *PLOS One* 6(5): e19467.
- Chew C, Eysenbach G (2010) Pandemics in the age of Twitter: content analysis of Tweets during the 2009 H1N1 outbreak. *PLOS One* 5(11): e14118.
- Bhattacharya S, Tran H, Srinivasan P, Suls J (2012) Belief surveillance with twitter. Proceedings of the 4th Annual ACM Web Science Conference (WebSci '12), pp. 43–46.
- Bhattacharya S, Tran H, Srinivasan P (2012) Discovering Health Beliefs in Twitter. Proceedings of AAAI Fall Symposium: Information Retrieval and Knowledge Discovery in Biomedical Text 2012.
- Eysenbach G (2009) Infodemiology and infoveillance: framework for an emerging set of public health informatics methods to analyze search, communication and publication behavior on the Internet. *J Med Internet Res* 11(1): e11.
- Kamal N, Fels S, Ho K (2010) Online social networks for personal informatics to promote positive health behavior. Proceedings of second ACM SIGMM workshop on Social media (WSM '10), pp.47–52.
- Thackeray R, Neiger BL, Smith AK, Van Wagenen SB (2012) Adoption and use of social media among public health departments. *BMC Public Health* 12: 242.
- HHS Social Hub. Available: <http://www.hhs.gov/socialhub/>. Accessed 2012 Nov 1.
- Twitter REST API v1.1 (user\_timeline). Available: [https://dev.twitter.com/docs/api/1.1/get/statuses/user\\_timeline](https://dev.twitter.com/docs/api/1.1/get/statuses/user_timeline). Accessed 2012 Nov 1.
- SentiStrength Webpage. Available: <http://sentistrength.wlv.ac.uk/>. Accessed 2012 Apr 1.
- Thelwall M, Buckley K, Paltoglou G, Cai D, Kappas A (2010) Sentiment strength detection in short informal text. *J Am Soc Inf Sci Technol* 61: 2544–2558.
- Thelwall M, Buckley K, Paltoglou G (2011) Sentiment in Twitter events. *J Am Soc Inf Sci Technol* 62: 406–418.
- Nielsen FÅ (2011) A new ANEW: Evaluation of a word list for sentiment analysis in microblogs. arXiv preprint arXiv: 11032903.
- Sullivan SJ, Schneiders AG, Cheang C-W, Kitto E, Lee H, et al. (2012) 'What's happening?' A content analysis of concussion-related traffic on Twitter. *Br J Sports Med* 46(4): 258–263.
- Medical Text Indexer (MTI). Available: <http://ii.nlm.nih.gov/mti.shtml>. Accessed 2013 Mar 1.
- Aronson AR, Bodenreider O, Demner-Fushman D, Fung KW, Lee VK, et al. (2007) From indexing the biomedical literature to coding clinical text: experience with MTI and machine learning approaches. Proceedings of the Workshop on BioNLP 2007: Biological, Translational, and Clinical Language Processing (BioNLP '07), pp. 105–112.
- Lipscomb CE (2000) Medical Subject Headings (MeSH). *Bulletin of the Medical Library Association* 88: 265.
- Bhattacharya S, Ha V, Srinivasan P (2011) MeSH: a window into full text for document summarization. *Bioinformatics* 27: i120–i128.
- Bodenreider O (2004) The Unified Medical Language System (UMLS): integrating biomedical terminology. *Nucleic Acids Res* 32: D267–D270.
- McCray AT, Burgun A, Bodenreider O (2001) Aggregating UMLS semantic types for reducing conceptual complexity. *Stud Health Technol Inform* 84(Pt 1): 216–220.
- UMLS Semantic Groups. Available: <http://semanticnetwork.nlm.nih.gov/SemGroups/SemGroups.txt>. Accessed 2013 Mar 1.
- Ver Hoef JM, Boveng PL (2007) Quasi-Poisson vs. negative binomial regression: how should we model overdispersed count data? *Ecology* 88: 2766–2772.
- Cheung YB (2002) Zero-inflated models for regression analysis of count data: a study of growth and development. *Stat Med* 21(10): 1461–1469.
- Cameron AC, Trivedi P (2013) *Regression analysis of count data*: Cambridge University Press.
- Winkelmann R, Zimmermann KF (1995) Recent developments in count data modelling: theory and application. *Journal of Economic Surveys* 9: 1–24.
- Mullahy J (1986) Specification and testing of some modified count data models. *Journal of Econometrics* 33: 341–365.
- Hu M-C, Pavlicova M, Nunes EV (2011) Zero-inflated and hurdle models of count data with extra zeros: examples from an HIV-risk reduction intervention trial. *Am J Drug Alcohol Abuse* 37(5): 367–375.
- Lewis F, Butler A, Gilbert L (2011) A unified approach to model selection using the likelihood ratio test. *Methods in Ecology and Evolution* 2: 155–162.
- Elandt R, Johnson NL (1980) *Survival models and data analysis*: John Wiley and Sons.
- Kalbfleisch JD, Prentice RL (2011) *The statistical analysis of failure time data*: John Wiley & Sons.
- Lawless JF (2011) *Statistical models and methods for lifetime data*: John Wiley & Sons.
- Yang J, Counts S (2010) Predicting the Speed, Scale, and Range of Information Diffusion in Twitter. Proceedings of Fourth International AAAI Conference on Weblogs and Social Media (ICWSM '10), pp. 355–358.
- Cox DR (1972) Regression models and life-tables. *Journal of the Royal Statistical Society Series B (Methodological)*: 187–220.
- Zhao WX, Jiang J, Weng J, He J, Lim E-P, et al. (2011) Comparing twitter and traditional media using topic models. *Advances in Information Retrieval*: Springer, pp. 338–349.
- Hermida A (2010) From TV to Twitter: How ambient news became ambient journalism. *Media/Culture Journal* 13(2).
- Messner M, Linke M, Eford A (2011) Shoveling tweets: An analysis of the microblogging engagement of traditional news organizations. Proceedings of 12<sup>th</sup> International Symposium on Online Journalism.
- Freifeld CC, Mandl KD, Reis BY, Brownstein JS (2008) HealthMap: global infectious disease monitoring through automated classification and visualization of Internet media reports. *J Am Med Inform Assoc* 15(2): 150–157.
- Suh B, Hong L, Pirulli P, Chi EH (2010) Want to be retweeted? large scale analytics on factors impacting retweet in twitter network. Proceedings of IEEE Second International Conference on Social Computing (SocialCom), pp. 177–184.
- Optimizing Twitter Engagement – Part 2: How Frequently to Tweet. Available: <http://tracksocial.com/blog/2012/10/optimizing-twitter-engagement-part-2-how-frequently-to-tweet/>. Accessed 2014 Apr 1.
- Bad Twitiquette: 10 Ways To Lose Your Twitter Followers, Fast! Available: <http://tweakyourbiz.com/management/2011/09/27/bad-twitiquette-10-ways-to-lose-your-twitter-followers-fast/>. Accessed 2014 Apr 1.
- Stieglitz S, Dang-Xuan L (2012) Political Communication and Influence through Microblogging—An Empirical Analysis of Sentiment in Twitter Messages and Retweet Behavior. Proceedings of 45th Hawaii International Conference on System Science (HICSS), pp. 3500–3509.
- Zarella D (2009) Science of retweets. Retrieved December 15: 2009.
- Neiger BL, Thackeray R, Burton SH, Thackeray CR, Reese JH (2013) Use of twitter among local health departments: an analysis of information sharing, engagement, and action. *J Med Internet Res* 15(8): e177.
- Singh S, Mishra N, Sharma S (2013) Survey of Various Techniques for Determining Influential Users in Social Networks. Proceedings of International Conference on Emerging Trends in Computing, Communication and Nanotechnology (ICE-CCN), pp. 398–403.
- Wu S, Gong L, Rand W, Raschid L (2012) Making recommendations in a microblog to improve the impact of a focal user. Proceedings of the sixth ACM conference on Recommender systems (RecSys '12), pp. 265–268.
- Bruns A, Burgess JE (2011) # ausvotes: How Twitter covered the 2010 Australian federal election. *Communication, Politics and Culture* 44: 37–56.
- Weitzel L, Quaresma P, de Oliveira JPM (2012) Evaluating Quality of Health Information Sources. Proceedings of IEEE 26th International Conference on Advanced Information Networking and Applications (AINA), pp. 655–662.
- Kwak H, Lee C, Park H, Moon S (2010) What is Twitter, a social network or a news media? Proceedings of the 19th international conference on World wide web (WWW '10), pp. 591–600.
- Naveed N, Gottron T, Kunegis J, Alhadi AC (2011) Bad news travel fast: A content-based analysis of interestingness on twitter. Proceedings of the 3rd International Web Science Conference (WebSci '11).
- Hansen LK, Arvidsson A, Nielsen FÅ, Colleoni E, Etter M (2011) Good friends, bad news-affect and virality in twitter. *Future Information Technology*: Springer, pp. 34–43.
- Petrovic S, Osborne M, Lavrenko V (2011) RT to Win! Predicting Message Propagation in Twitter. Proceedings of Fifth International AAAI Conference on Weblogs and Social Media (ICWSM '11).
- Dodds PS, Harris KD, Kloumann IM, Bliss CA, Danforth CM (2011) Temporal patterns of happiness and information in a global social network: Hedonometrics and Twitter. *PLOS One* 6: e26752.
